1 **Title: Hunting with catapults: the predatory strike of the dragonfly larva**

2 **Authors:** Sebastian Büsse\*, Alexander Koehnsen, Hamed Rajabi & Stanislav N. Gorb

3 **Affiliations:**

4 Department of Functional Morphology and Biomechanics, Institute of Zoology, Kiel University, Am  
5 Botanischen Garten 9, 24118 Kiel, Germany.

6  
7 \*Correspondence to: sbuesse@zoologie.uni-kiel.de

8  
9 **Abstract:** Dragonfly larvae capture their prey with a strongly modified -extensible- mouthpart using  
10 a biomechanically unique but not yet understood mechanism. The current opinion of hydraulic  
11 pressure being the driving force of the predatory strike can be refuted by our manipulation  
12 experiments and reinterpretation of former studies. On this fact, we present evidence for a  
13 synchronized dual-catapult system powered by two spring-loaded catapults. The power output of the  
14 system exceeds generally the maximum power achievable by musculature. Energy for the movement  
15 is stored by straining a resilin-containing structure at each joint and possibly the surrounding cuticle  
16 which is preloaded by muscle contraction. To achieve the precise timing required to catch fast-moving  
17 prey, accessory structures are used to lock and actively trigger the system, ensuring the  
18 synchronisation of both catapults. As a proof of concept, we developed a bio-inspired robotic arm  
19 resembling the morphology and functional principle of the extensible mouthpart. Our study elucidates  
20 the predatory strike of dragonfly larvae by proposing a novel mechanism, where two synchronized  
21 catapults power the ballistic movement of prey capturing in dragonfly larvae – a so-called  
22 synchronized dual-catapult system. Understanding this complex biomechanical system may further  
23 our understanding in related fields of bio inspired robotics and biomimetics.

24

25 **One Sentence Summary:** The synchronized dual-catapult, a biomechanically novel  
26 mechanism for the ballistic movement of prey capturing in dragonfly larvae

27

28 **Keywords:** biomechanics; functional morphology; catapult system; ballistic movement;  
29 power modulation; robotic arm

30

31 **Introduction**

32 Throughout all animal groups, predator–prey relationships often cause an arms race that can lead to

33 the development of elaborate biomechanical mechanisms (1). These mechanisms often rely on very  
34 fast movements (ballistic movements), for example in prey capturing or jumping (latter most often  
35 used as defensive escape mechanism; 2-6). As there is an inverse relationship between the force output  
36 and contraction speed of a muscle, movements relying on high acceleration cannot be driven directly  
37 by muscle power. The power output, thus, is modulated to a degree far surpassing the maximal power  
38 of a muscle (7-10) due to the instantaneous release of stored energy (7,11). In many cases these  
39 ballistic movements are enabled by a catapult mechanism, where a spring is locked in position and  
40 slowly preloaded (for example via muscle contraction). The stored energy is released almost  
41 instantaneously via a trigger mechanism (11) - the simplest catapult systems is a slingshot.  
42 One example of these complex movements is the defensive escape jump of froghoppers (Insecta:  
43 Cicadomorpha; 4, 6). Here a catapult-like elastic mechanism is used to perform one of the fastest  
44 jumps known by using chitinised cuticle as a spring (3). The elastic protein resilin rapidly returns the  
45 leg to its original shape after a jump (using the jumps energy) and allows for repeated jumping (6).  
46 Resilin represents an essential element of high resilience, low fatigue, and damping mechanisms in  
47 arthropods (12) due to its viscoelastic properties (13). In the specific case of a catapult system, the  
48 near-perfect resilience (92–97%) and a fatigue limit of over 300 million cycles (14) in combination  
49 with the ability to stretch to over three times its original length and recoil to its initial state without  
50 plastic deformation (15,16) become important.

51  
52 Our example here, is the predatory strike Odonata (dragonflies and damselflies) larvae use to capture  
53 prey – they evolved a strongly modified, extensible mouthpart called prehensile labial mask (Fig. 1A;  
54 17,18). These larvae are key predators in their freshwater habitats, hunting invertebrates as well as  
55 small vertebrates like tadpoles or fish from an ambush (19). These insects can project their specialised  
56 mouthpart towards the prey, enabling the larvae to hunt effectively (see supplementary movie S1; 18).  
57 Previous investigations concluded that the protraction of the extensible mouthpart (prehensile labial  
58 mask) is partially driven by hydraulic pressure (20-24). Strong abdominal dorso-ventral muscles in a  
59 rectal chamber – which is also used for respiration – can compress this chamber, thus generating  
60 pressure (25, 26). By compressing the chamber, a water jet is ejected that propels the larvae forwards  
61 (25, 26) – this, so-called jet propulsion, represents a special escape behaviour similar to that of squids  
62 (27) – and was supposed to be redirected and used for the predatory strike (20-24). However, already  
63 Tanaka and Hisada suggested a combination of hydraulic pressure and co-contraction of the power  
64 muscles as driving force for the predatory strike (23). Yet they conducted electrophysiological  
65 experiments with no active muscle during the protraction of the mask (see details below).  
66 Even more, muscle dissecting experiments (23) as well as the presence of specialised morphological  
67 structures resembling a locking mechanism (28), suggest the necessity of a reinterpretation of the  
68 entire system (see also 29).

69

70 We present evidence for a synchronised dual-catapult system as the driving force of the predatory  
71 strike in dragonfly larva. Energy provided by the rather slow contraction of muscles is stored by  
72 deformation of two cuticular structures. These two catapults are connected by a joint and operated  
73 together (Fig. 1B) to allow for the mentioned power modulation. We could show that the power output  
74 required to achieve the observed angular acceleration of the extensible mouthpart (prehensile labial  
75 mask) of dragonfly larvae exceeds the power output achievable by the associated musculature (8-10)  
76 and therefore making a purely muscle driven movement impossible. Furthermore, our manipulation  
77 experiments refute the hypothesis of hydraulic pressure as the driving force (20-24). These findings,  
78 combined with our morphological data and the bio-inspired robotic arm as proof of concept, provide  
79 compelling evidence for the hypothesis, that the extensible mouthpart (prehensile labial mask) is  
80 driven by a dual catapult mechanism.

81 To understand such complex biomechanical system, highlights the evolutionary diversity of insects  
82 and often leads to advances in the fields of bio-inspired robotics and biomimetics - as our robotic arm  
83 may suggest.

84

## 85 **Results & Discussion**

### 86 *General morphology and material composition*

87 The extensible mouthpart (prehensile labial mask) of dragonfly larvae in general is a highly modified  
88 apomorphic character (17,18) – so, a unique character for dragon- and damselflies; which is developed  
89 as prey capturing device (19). The overall structure consists of a segment 1 (prementum) and 2  
90 (postmentum), which are connected via a cubital-like hinge joint – the connecting joint (prementum-  
91 postmentum joint; p-p joint) – allowing uniaxial rotation of both segments relative to each other (Fig.  
92 2A-C, 3; 18). The prehensile labial mask is connected to the head capsule ventrally via the segment 2  
93 (postmentum) by a membranous joint-like suspension – the head joint (postmentum-head joint; p-h  
94 joint) – allowing uniaxial rotation of the extensible mouthpart (prehensile labial mask) relative to the  
95 head (Fig. 2A-C, 3; 18). The connecting joint (p-p joint) consists of large membranous areas, likely  
96 supplemented with resilin (28). For a detailed description on the morphology and/or material  
97 composition of the mouthparts of dragonflies we refer to (18,28).

98

### 99 *Introduction of the synchronized dual-catapult system*

100 We propose a novel biomechanical mechanism for the protraction of the extensible mouthpart  
101 (prehensile labial mask): a synchronised dual-catapult system, consisting of two catapults activated  
102 simultaneously as the main driving force for the predatory strike of dragonfly larvae (Fig. 1B). Both  
103 catapults are spring-loaded (7,11), generating the main power for the strike by storing elastic strain  
104 energy which can be rapidly converted into kinetic energy to enable the high-speed movement. The  
105 first catapult provides the power to move the entire extensible mouthpart (prehensile labial mask)  
106 towards the prey, with the head joint (p-h joint) as the pivot of rotation (Fig. 2, 3). The second catapult

107 opens the connecting joint (p-p joint; Fig. 2, 3), moving the segment 1 (prementum) downwards and  
108 enabling the extensible mouthpart (prehensile labial mask) to unfold (see supplementary movies S1  
109 and S2). In both catapult systems an internal structure is used to store the energy generated by  
110 relatively slow action of muscles (Fig. 3, 4A-C). Both structures contain considerable amounts of the  
111 viscoelastic protein resilin (*I3*) (Fig. 4B, C) which might represent an essential component of this  
112 system; however, the surrounding cuticle might play a major role in energy storage as well (cf. 30,31).  
113 To allow energy storage in spring-loaded catapult systems, a lock is needed to prevent untimely  
114 release (Fig. 4; 11). Here, a complex latch mechanism can be found: a clamp, consisting of a groove  
115 and a knob that can engage with each other, is locked by a wedge (Fig. 4D-J); locking the system to  
116 enable spring loading when needed (Fig. 3). To ensure precise timing of the predatory strike, this dual  
117 catapult also needs an active trigger, which is represented by a muscle that can remove the mentioned  
118 wedge (Fig. 3C, 4H-J). The two parts of the clamp slide apart and this movement will change the  
119 angle of attack (Fig. 4H-J), so that the energy stored in the system will rotate the pivot and cause the  
120 catapult arms (segment 1 and 2) to snap forward (Fig. 2,3).

121  
122 To allow for a better understanding of this complex biomechanical process, this mechanism with all  
123 the structures involved is visually presented and comprehensively explained in a 3D-animation  
124 (supplementary movie S2) representing the here proposed biomechanical hypothesis. Furthermore, a  
125 detailed description of all the involved structures can be found in the following.

### 127 *The dual-catapult system in detail*

128 The dual-catapult system can be subdivided into two interconnected catapults with a single lock (Fig.  
129 3,4), with one mechanism unfolding segment 1 (prementum) and segment 2 (postmentum) - catapult 2  
130 - and one mechanism projecting the entire extensible mouthpart (prehensile labial mask) - catapult 1.  
131 At the catapult 1, the sclerite catapult 1 (T-rod) is responsible for storing energy provided by the  
132 power muscle of catapult 1 (0hy7; fig 2-4). The spring of catapult 1 (T-rod) is a small sclerite, and its  
133 resilin-dominated material composition suggests flexible and resilient properties (Fig. 4 A, B,  
134 supplementary figure S4). At catapult 2, energy provided by the power muscle catapult 2 (0la5) is  
135 stored in the spring of catapult 2 (premental sclerite; fig 2-4), which is also resilin-dominated (Fig. 4A,  
136 C, supplementary figure S4). After the latch system has been locked by the locking muscle (0la8; fig.  
137 3A), the power muscle of catapult 1 (0hy7) deflects the spring of catapult 1 (T-rod; force fm1 in fig.  
138 3B). Simultaneously, the spring of catapult 2 (premental sclerite) is deflected by the power muscle of  
139 catapult 2 (0la5; force fm2 in fig. 3B). To simulate the deformation of the sclerites we used a muscle  
140 relaxant agent (MgCl<sub>2</sub>) and a muscle contraction agent (KCl). We were able to show that muscle  
141 contraction induces a “loaded spring condition” (Supplementary figure 2 D, F) while muscle  
142 relaxation induces an “unloaded spring condition” (Supplementary figure 2 E, G) (see also Materials  
143 & Methods section). The fact that muscle contraction indeed deforms the sclerites corroborates our

144 hypothesis, that these structures are involved in the described catapult system and are acting as energy  
145 storage devices, likely in combination with the surrounding cuticle. This kind of cuticle deformation  
146 that is used for energy storage is for example described for trap jaw ants (cf. 31), here the entire head  
147 is deformed by approximately 6% to allow for their powerful mandibular strike.

148 To lock the extensible mouthpart (prehensile labial mask) during preloading and trigger a strike, we  
149 propose an active latch mechanism at the connecting joint (p-p joint). The latch mechanism is  
150 composed of: i) the locking groove (premental groove; cf. 28), which is present on segment 1  
151 (prementum; fig. 4D,G), ii) the locking knob (postmental knob; cf. 28), which is the counterpart to the  
152 groove on the corresponding area of segment 2 (postmentum), – i) and ii) together forming a clamp  
153 (Fig. 4D,E), iii) the locking wedge (p-p articular plate; cf. 28) within the connecting joints (p-p  
154 joint) articulation (Fig. 4D,F), and iv) the trigger muscle (01a15; fig. 3A). Firstly, the contraction of the  
155 locking muscle (01a8; fig. 3A, 4A) provides the energy to actively push the knob over the groove (Fig.  
156 3A,4H), locking the system to enable spring loading when needed. At this point, the locking knob  
157 (postmental knob) clamps behind the locking groove (premental groove) and the locking wedge (p-p  
158 articular plate), is sitting in between, locking these structures like a wedge (Fig. 3A,B, 4I). For a  
159 predatory strike, both catapults need to be triggered. Contraction of the trigger muscle (01a15; fig. 3C)  
160 triggers the catapults by removing the wedge (p-p articular plate) thus forcing the locking groove  
161 (premental groove) and the locking knob (postmental knob) to slide apart (Fig. 3C, 4J).

162  
163 The material composition of these cuticular structures supplement the locking function: the locking  
164 wedge (p-p articular plate) is divided into two parts with a resilin-dominated ridge at the divide,  
165 that allows the folding into a wedge-like sclerite. The locking groove (premental groove) is sclerotised  
166 and represents the slot for the locking knob (postmental knob). In turn, the knob serves as the clamp of  
167 the latch, it is composed of a sclerotised ridge, at the contact area with the groove; the surrounding  
168 resilin-dominated areas allows for movability during locking and unlocking (Fig. 4D-G). In Büsse &  
169 Gorb (28) the material composition of these parts is described in more detail.

170  
171 The release of segment 1 (prementum) changes the traction angles of the co-contracting power muscle  
172 catapult 1 (0hy7) and power muscle catapult 2 (01a5), causing power muscle catapult 2 (01a5; running  
173 above the pivot of rotation of the segment 2 (postmentum)) to lose tension rapidly. Therefore, the  
174 power muscle catapult 1 (0hy7; running below the pivot of rotation of the segment 2 (postmentum)),  
175 which is connected to the preloaded sclerite catapult 1 (T-rod), is pulling the segment 2 (postmentum)  
176 forward. Simultaneously, both the preloaded sclerite catapult 1 (T-rod) as well as the preloaded sclerite  
177 catapult 1 (premental sclerite) release the stored modulated power (force  $f_{c1}$  and  $f_{c2}$  in fig. 3D),  
178 leading to a projection of the extensible mouthpart (prehensile labial mask).

179

180 *Performance of the catapult system*

181 The extensible mouthpart (prehensile labial mask), respectively the two compartments segment 1  
182 (prementum) and segment 2 (postmentum), reach tangential velocities of  $\approx 0.5 \text{ m s}^{-1}$  and  $0.7 \text{ m s}^{-1}$ ,  
183 angular velocities of  $\approx 71 \text{ rad s}^{-1}$  and  $73 \text{ rad s}^{-1}$ , tangential acceleration of  $\approx 40$  and  $67 \text{ m s}^{-2}$  as well as  
184 peak angular acceleration of 5918 and 6674  $\text{rad m s}^{-2}$  (Table 1, supplementary figure S1, S5). For a  
185 typical strike, a power output of  $\approx 2233 \text{ W kg}^{-1}$  and  $2114 \text{ W kg}^{-1}$  is necessary to achieve the mentioned  
186 performance Here we conservatively calculated the minimum power requirements (we neglect the  
187 drag of the system and therefore underestimates the power output); however, the calculated power  
188 output surpasses the power output of the fastest-contracting muscles known considerably (8-10). One  
189 of the most powerful muscles mentioned in the literature is that of the blue breasted quail (*Coturnix*  
190 *chinensis*) reaching a max. power output during take-off of approximately  $400 \text{ W kg}^{-1}$  (32). The  
191 calculated power output for the catapult system powering the predatory strike of dragonfly larvae is  
192 intermediate between the lowest power output values for catapult systems using power modulation  
193 described, like snow fleas (33) with  $740 \text{ W kg}^{-1}$  or flea beetles (34) with  $714 \text{ W kg}^{-1}$  and the most  
194 powerful systems like the jumps of froghoppers (3) with  $3.6 \times 10^4 \text{ W kg}^{-1}$  or the most powerful  
195 predatory strike of mantid shrimps (5) with  $4.7 \times 10^5 \text{ W kg}^{-1}$ . Confirming that the predatory strike of  
196 dragonfly larvae is indeed power modulated.

197

#### 198 *Manipulation experiments and support of the hypothesis*

199 As mentioned before, the power output of the system surpasses the maximum power of a muscle, as  
200 already suggested by (23). However, previous investigations indicated that the driving power for the  
201 protraction of the extensible mouthpart (prehensile labial mask) is based on hydraulic pressure (20-  
202 24). In our high-speed video experiments, we could show that *Anax* larvae ( $n = 5$ ) eject a water jet  
203 from the rectal chamber (jet propulsion) during the prey capturing process (see supplementary movie  
204 S3 part A). The simultaneity of predatory strike and jet propulsion is most likely a mechanism to  
205 counter the recoil which originates from the antagonistic force of quickly accelerating the rather large  
206 extensible mouthpart (prehensile labial mask; 35). This observation is further supported by high-speed  
207 video recordings of *Sympetrum* larvae, where the larvae show no jet propulsion but a distinct recoil  
208 during the prey capturing process (see supplementary movie S3 part B). Larvae of this taxon are  
209 partially burrowed in the soil during hunting (19) so jet propulsion seems not to be used/needed for  
210 recoil prevention. Furthermore, our observations show dragonflies using jet propulsion for moving  
211 towards the prey and performing a predatory strike almost simultaneously. These observations are  
212 supported by similar findings for other anisopteran species (36). On the one hand, the same  
213 mechanism cannot be used for both jet propulsion and propelling the prehensile mask – especially  
214 because the predatory strike needs a closed abdomen (anal valve) and jet propulsion an open one (20).  
215 On the other hand, the simultaneity of these processes might explain the peaks in the hydraulic  
216 measurements during the prey capturing process in earlier investigations (21-24) and therefore the  
217 associated misinterpretation that hydraulic pressure is involved in the protraction of the extensible



218 mouthpart (prehensile labial mask).

219

220 Furthermore, the study of Tanaka and Hisada (23), especially the included electrophysiology, showed  
221 impressively that the only muscles capable of moving segment 1 (prementum) and 2 (postmentum) –  
222 the power muscle catapult 2 (0la5; extensor - 23) and power muscle catapult 1 (0hy7; flexor - 23) – are  
223 not active during the protraction of the extensible mouthpart (prehensile labial mask; fig. 2D). Their  
224 experiments highly support our findings: i) both power muscles are active before the starting point of  
225 the predatory strike, ii) both muscles are inactive during the main power output of the system, the  
226 protraction, iii) are active again during the retraction of the extensible mouthpart (prehensile labial  
227 mask; fig. 2D; 23). Even more their muscle dissection experiments (23) clearly showed the importance  
228 of the extensible mouthparts (prehensile labial mask) musculature and the insignificance of hydraulic  
229 pressure. Dissection of either power muscle catapult 1 (0hy7) or power muscle catapult 2 (0la5) causes  
230 abnormal strike movements. Especially after dissection of power muscle catapult 1 (0hy7), the head  
231 joint (p-h joint) remains immobile, whereas the connecting joint (p-p joint) opens rapidly and the  
232 extensible mouthparts (prehensile labial mask) hits the ground (23). In this case, the power muscle  
233 catapult 1 (0hy7) is not able to preload the spring of catapult 1 (T-rod), thus causing the abnormal  
234 strike behaviour – however, this is not affecting catapult 2. Additionally, we performed manipulation  
235 experiments, using the physiological effect of MgCl<sub>2</sub> as muscle relaxant agent (37) to manipulate the  
236 abdominal muscles of the rectal chamber (25, 26) in such a way as to prevent the generation of  
237 hydraulic pressure either for jet propulsion or for the protraction of the extensible mouthparts  
238 (prehensile labial mask; 20-24). After injecting MgCl<sub>2</sub> into parts of the abdominal muscles related to  
239 the rectal chamber, *Anax* larvae (n = 5) were able to perform a predatory strike but could not use jet  
240 propulsion as an escape mechanism in response to an external stimulus (see supplementary movie S4).  
241 As a control, unmanipulated *Anax* larvae (n = 5) showed jet propulsion in direct response to an  
242 external stimulus (see supplementary movie S4). This manipulation experiments clearly refuted the  
243 hydraulic hypothesis (21-24).

244

245 The electrophysiology and muscle dissection experiments (23) as well as the manipulation  
246 experiments completely refuted the hydraulic hypothesis (20-24). Also, the combinational hypothesis  
247 of Tanaka and Hisada (23) where hydraulic pressure and muscular co-contraction is producing the  
248 main power for the predatory strike can be refuted. The power output calculations clearly show that  
249 muscle contraction alone cannot provide the power necessary for the observed movement. Hence these  
250 findings strongly corroborate our hypothesis that the driving power for the protraction of the  
251 extensible mouthparts (prehensile labial mask) is generated by a synchronised dual-catapult system.

252

253 *Proof of concept*

254 To test whether the hypothesized interplay of muscles, springs and locks can actually generate a

255 predatory strike like motion, we used our detailed morphological findings to create a robotic model of  
256 the prehensile labial mask (fig. 5). The  $\mu$ CT-data was used to ascertain general proportions and match  
257 the axes of rotation of both head joint (p-h joint) and connecting joint (p-p joint) as exactly as possible.  
258 Muscle movement was imitated by servo motors with matched traction angles. The energy storing  
259 sclerites were imitated by steel tension springs (see material & methods). Using this setup, based on  
260 the described morphology and hypothesized mechanical configuration, we could show that the  
261 artificial extensible mouthparts (prehensile labial mask) is moving in a comparable way as the real  
262 predatory strike of a dragonfly larvae (see supplementary movie S5). This proof of concept is  
263 intriguingly underlining our hypothesis.

264

## 265 **Conclusion**

266 All in all, we could show that 1) the power output of the system exceeds the maximum power of a  
267 muscle and therefore making a purely muscle driven movement impossible; 2) the proposed hydraulic  
268 hypothesis as driving force for the predatory strike was a misinterpretation and can be refuted; 3) the  
269 present morphology of the extensible mouthparts (prehensile labial mask) represents two catapult  
270 systems. The question whether the energy for this high-speed movement is solely stored in the  
271 described resilin-dominated sclerites, or parts of the surrounding cuticle are involved as well; requires  
272 further research. However, this does not change the functional principle we described here. Our proof  
273 of concept using a robotic arm shows impressively the functionality of the proposed mechanism. Our  
274 study thus elucidates the predatory strike of dragonfly larvae by proposing a dual-catapult mechanism  
275 for the first time. Also highlighting the role of the cuticle as a complex composite material enabling  
276 structural integrity and energy storage as one of the main components required for these movements.  
277 By implementing two catapults that are triggered together but can be differentially preloaded, this  
278 mechanism is probably capable of higher targeting accuracy than other catapults. This makes the  
279 prehensile labial mask an intriguing model for further research concerning catapults in biology as well  
280 as robotics.

281

## 282 **Materials & Methods**

283

### 284 *Animals*

285 Specimens of *Anax* sp. (Anisoptera: Aeshnidae), *Sympetrum* sp. (Anisoptera: Libellulidae) were  
286 collected in Kiel (Germany) in 2016 and 2017 with permission of the 'Landesamt für Landwirtschaft,  
287 Umwelt und ländliche Räume Schleswig-Holstein'.

288

### 289 *Micro-computed tomography*

290 Prior to micro-computed tomography ( $\mu$ CT) analysis, specimens (n=3 per treatment) were fixed for  
291 high tissue preservation in alcoholic Bouin solution (= Duboscq-Brasil). We used 3 different



292 treatments prior the tissue preservation: i) for muscle relaxation, pre-fixation in magnesium chloride  
293 (MgCl<sub>2</sub>), ii) for muscle contraction, pre-fixation in potassium chloride (KCl) and iii) no pre-fixation.  
294 To guarantee that the fixation with KCl as well as MgCl<sub>2</sub> is not causing artefacts we incubated a test  
295 samples (n=3 per structure) for 48h and measured their dimensions using an optical-three-dimensional  
296 measuring microscope (VR-3000 series, Keyence, Osaka, Japan; supplementary figure S3). Prior to  
297 scanning the samples were dehydrated in an ascending ethanol series and critical-point dried (Quorum  
298 E3000; Quorum Tech Ltd., Laughton, UK). For  $\mu$ CT, the critical-point dried samples were mounted on  
299 a device-specific specimen holder and scanned (SkyScan 1172; Bruker micro-CT, Kontich, Belgium)  
300 with high-resolution settings (40 kV, 250  $\mu$ A and 0.25° rotation steps, performing a 360° scan).  
301 Segmentation and processing of the  $\mu$ CT-data were carried out with Amira 6.0.1 (FEI SAS, Lyon,  
302 France). The segmented data were exported as Wavefront ‘.obj’ files for further processing. For three-  
303 dimensional visualisation, textures and material shaders for rendering were applied using the open  
304 source 3D creation suite Blender (Blender Foundation, Amsterdam, Netherlands, [www.blender.org](http://www.blender.org)).  
305 To Visualise our hypothesis of the predatory strike an armature rig was applied to a CT Data based,  
306 retopologised 3D model and keyframe animation was performed using the high-speed videos as  
307 references for correct positioning, angles and timing of the animation. Clips were created using the  
308 integrated ‘Cycles’ rendering engine with a resolution of 1920 x 1080p at 25 fps. Animation sequences  
309 were saved as ‘Cineon’ image stacks and the final clip was edited in Adobe Premiere Pro CS6 (Adobe  
310 Systems Software, San José, CA, USA). Additional 2D animations were created in Adobe After  
311 Effects CS6 (Adobe Systems Software, San José, CA, USA).

### 313 *Confocal laser-scanning microscopy*

314 All specimens used for confocal laser-scanning microscopy (CLSM) were freshly frozen and stored at  
315 -70 °C. The samples were washed in ethanol (100%) and dirt particles were removed using ultrasonic  
316 cleaning (Sonorex RK52; Bandelin, Berlin, Germany). The dissected parts were embedded in  
317 glycerine (99,99%) on a glass slide and covered with a high-precision cover slip (Carl Zeiss  
318 Microscopy, Jena, Germany) prior to scanning. For visualisation, a Zeiss LSM 700 (Carl Zeiss  
319 Microscopy, Jena, Germany) was used with the wavelengths 405, 488, 555 and 639 nm and the  
320 emission filters BP420–480, LP490, LP560, and LP640 nm. Maximum intensity projections were  
321 created using ZEN 2008 software ([www.zeiss.de/mikroskopie](http://www.zeiss.de/mikroskopie)). For more information on using CLSM  
322 to determine the material properties of the insect cuticle, refer to Michels & Gorb (36) or Büsse &  
323 Gorb (28). All images obtained via  $\mu$ CT and CLSM were subsequently processed and combined into  
324 figure plates using Affinity Photo and Affinity Design ([www.affinity.serif.com](http://www.affinity.serif.com)).

### 326 *Toluidine blue staining*

327 As secondary resilin verification we used a toluidine blue staining (13,38-41). The structures (T-rod  
328 and premental sclerite) were incubated with 0.1–0.5% toluidine blue (in an aqueous solution of 1%

329 sodium tetraborate) for 30–60 s and destained using glycerin for 48h (see supplementary figure S4).  
330 Subsequently analyzed using an optical-three-dimensional measuring microscope (VR-3000 series,  
331 Keyence, Osaka, Japan), to detect the bluish stain of resilin containing structures.

332

### 333 *High-speed video recordings*

334 For the high-speed video recordings of the prey capturing process, we used a Photron Fastcam SA1.1  
335 (model 675K-M1; Photron, Pfullingen, Germany) equipped with a 105 mm/1:2.8 macro lens (Sigma,  
336 Tokyo, Japan) mounted on a Manfrotto-055 tripod with a Manfrotto-410 geared head (Manfrotto, Spa,  
337 Italy) and two Dedocol COOLT3 light sources (Dedotech, Berikon, Switzerland). Settings: 5400  
338 frames per second, exposure time: 1/frame, trigger mode: end, resolution: 1024 x 1024 pixel. Footage  
339 was saved as 16-bit TIFF image stacks. Predatory strikes of 5 specimens of *Anax* sp. as well as  
340 *Sympetrum* sp. were recorded, with two strikes per individual. Chironomid larvae were manually  
341 presented as prey items.

342

### 343 *Motion tracking*

344 Frame by frame data on the position of the prehensile labial mask was obtained from five individuals  
345 of *Anax* sp. using the workflow described by Koehnsen et al. (42) From tracking coordinates, the angle  
346 between head capsule and postmentum, as well as prementum and postmentum were calculated for  
347 every frame. Angular velocity was calculated at every 4th frame and Data was smoothed using an 11th  
348 order polynomial (Polynomial regression using R, see also supplementary figure S1b). Angular  
349 acceleration was calculated as first order derivative of the obtained curve. Peak velocity and  
350 acceleration were obtained from local maxima of the respective curves. Tangential  
351 velocity/acceleration at the tip of the prementum/postmentum were calculated from angular  
352 velocity/acceleration with the radius  $r$  being the average distance from the pivot point to the tip of the  
353 respective structure based on all study animals used ( $n=5$ ). All calculations were done using the open  
354 source statistical computation software R Studio (Version 3.3.1 The R Foundation for Statistical  
355 Computing, Vienna, Austria).

356

### 357 *Terminology*

358 We will use the term dragonfly(ies) for Odonata (dragonflies + damselflies) for the sake of simplicity.  
359 Morphological terminology was used after Büsse et al. (18) and Büsse & Gorb (28). Further, we  
360 decide to use the term power modulation rather than power amplification. The latter is widespread  
361 within the biomechanics literature, yet it is misleading. The total energy of a system is conserved over  
362 time (first law of thermodynamics). The power (and concordantly energy) output of a closed system  
363 can therefore not be amplified by means within the system, which the term power amplification  
364 suggests. Instead the power output is modulated (43). Energy is stored and later released, leading to an  
365 increased peak power output. For more information on the topic we suggest Haldane et al. (42).

366 *Power output calculations*

367 The prehensile labial mask of *A. imperator*, was modelled as a planar linkage mechanism with  
368 two rigid links; postmentum (pm) and prementum (prm). The mechanism was assumed to be  
369 pinned at the postmentum-head joint (p-h joint), which works as a fixed rotation axis. The  
370 relative rotation of the links was allowed at the prementum-postmentum joint (p-p joint).  
371 Supplementary figure 5 represents the system before and during a strike. For the fixed-axis  
372 rotation of the system about the postmentum-head joint (p-h joint), we expressed the moment  
373 equation as

$$374 \quad \sum \vec{M}_{p-h} = \vec{M}_{pm} + \vec{M}_{prm}, \quad (1)$$

375 where  $\vec{M}_{p-h}$  is the total moment needed to accelerate the system about the postmentum-head  
376 joint (p-h joint).  $\vec{M}_{pm}$  and  $\vec{M}_{prm}$  are the moments required to accelerate the postmentum (pm)  
377 and prementum (prm) about their joints, respectively.

378 We first determined  $\vec{M}_{pm}$  using the following equation

$$379 \quad \vec{M}_{pm} = I_{pm_{p-h}} \vec{\alpha}_{pm}. \quad (2)$$

380 In this equation,  $\vec{\alpha}_{pm}$  is the vector of the angular acceleration of the postmentum (pm), which  
381 was derived from the experimental data.  $I_{pm_{p-h}}$  is the mass moment of inertia of the  
382 postmentum (pm) about an axis through the postmentum-head joint (p-h joint) and was  
383 calculated as:

$$384 \quad I_{pm_{p-h}} = \frac{1}{3} m_{pm} l_{pm}^2, \quad (3)$$

385 where  $m_{pm}$  and  $l_{pm}$  are the mass and the length of the postmentum (pm).

386 To calculate  $\vec{M}_{prm}$ , on the other hand, we first determined the linear velocity of the  
387 prementum-postmentum joint (p-p joint) using the following equation

$$388 \quad \vec{a}_{pp} = \vec{\omega}_{pm} \times (\vec{\omega}_{pm} \times \vec{r}') + \vec{\alpha}_{pm} \times \vec{r}'. \quad (4)$$

389 In this equation,  $\vec{a}_{pp}$  is the vector of the linear velocity of the prementum-postmentum joint  
390 (p-p joint).  $\vec{\omega}_{pm}$  is the vector of the angular velocity of the postmentum (pm) and was  
391 measured based on the experimental data.  $\vec{r}'$  is the position vector of the prementum-  
392 postmentum joint (p-p joint).

393  $\vec{a}_{pp}$ , which was calculated using equation (4), was then used to calculate  $\vec{a}_{prm}$ , the vector of  
394 the linear acceleration of the mass center of the prementum (prm), as follows

395 
$$\vec{a}_{prm} = \vec{a}_{pp} + \vec{\omega}_{prm} \times (\vec{\omega}_{prm} \times \vec{r}) + \vec{\alpha}_{prm} \times \vec{r} . \quad (5)$$

396 In the above equation,  $\vec{\omega}_{prm}$  and  $\vec{\alpha}_{prm}$  are the vector of the angular velocity of the prementum  
397 (prm) and the vector of the angular acceleration of the prementum (prm), respectively. Both  
398  $\vec{\omega}_{prm}$  and  $\vec{\alpha}_{prm}$  were obtained from experiments.  $\vec{r}$  is the position vector of the mass center of  
399 the prementum (prm).

400 After calculating  $\vec{a}_{prm}$  using equation (5), the result was substituted into the moment equation  
401 of the prementum (prm) about the prementum-postmentum joint (p-p joint) as follows

402 
$$\vec{M}_{prm} = I_{prm_{p-p}} \vec{\alpha}_{prm} + \vec{r} \times m_{prm} \vec{a}_{prm} , \quad (6)$$

403 where  $m_{prm}$  is the mass of the prementum (prm) and  $I_{prm_{p-p}}$  is the mass moment of inertia of  
404 the prementum (prm). The latter was determined using the equation below

405 
$$I_{prm_{p-p}} = \frac{1}{12} m_{prm} l_{prm}^2 , \quad (7)$$

406 where  $l_{prm}$  is the length of the prementum (prm).

407 After calculating  $\vec{M}_{pm}$  and  $\vec{M}_{prm}$  using equations (2) and (6), the results were substituted into  
408 the equation below and the power output,  $P$ , of each of the two muscles (i.e. 0la8 and 0hy7)  
409 was determined at different time steps during the strike

410 
$$P = \frac{\omega M}{m} . \quad (8)$$

411 In this equation,  $\omega$  is the magnitude of the vector of the angular velocity of each link,  $M$  is  
412 the magnitude of the moment accelerating the link, and  $m$  is the mass of the muscle involved  
413 in the link rotation. The mass of each muscle was taken from (23). The velocity measurements  
414 were repeated for the data extracted from five individuals with ten predatory strikes.

415

#### 416 *Manipulation experiments*

417 For the manipulation experiments, we injected 2–4 ml of a 20 mmol/l solution of magnesium chloride  
418 (MgCl<sub>2</sub>) as muscle relaxant agent (37) into the abdominal dorso-ventral muscles of *Anax* sp. larvae  
419 (n=5). After 2 to 5 min, the injected dorso-ventral musculature was relaxed and the specimens were  
420 not able to produce the necessary hydraulic pressure for jet propulsion (in response to an external  
421 stimulus). Chironomid larvae (Insecta: Diptera) were manually presented as prey items. After a  
422 successful predatory strike, the larvae were given an external stimulus to trigger an escape reaction.  
423 We scored the ability to use jet propulsion as an escape mechanism after a successful predatory strike  
424 in manipulated and unmanipulated specimens.

425

426 *Artificial prehensile mask (proof of concept)*

427 To proof the concept of a catapult driven prehensile labial mask, that can successfully generate a  
428 predatory strike using the herein described morphology, we construct an artificial model. A 3D model  
429 was designed using the 3D creation suite Blender (v2.79, Blender Foundation, Netherlands,  
430 [www.blender.org](http://www.blender.org)). Relative proportions, axes of rotation and angles of traction were derived from CT  
431 data and hs-video. Individual parts were exported as “.stl” files, and printed on a Prusa i3 Mk2S FDM  
432 3D printer (Prusa Research s.r.o., Prague, Czech Republic) using polylactic acid filament (Prusa  
433 Research s.r.o., Prague, Czech Republic). Steel tension springs (One9.1x27.4x1mm spring at the ph-  
434 catapult and two 5.7x59.2x.06mm springs at the pp-catapult) serve as energy storage devices. Each  
435 catapult is preloaded using two Turnigy MX-M801 servo motors (HexTronics Ltd. Kowloon Bay,  
436 Hong Kong). The latch mechanism is triggered using a HobbyKing HK 15178 servo motor  
437 (HexTronics Ltd. Kowloon Bay, Hong Kong). Motors are controlled by an Arduino Uno R2 Board  
438 (Arduino.cc) using custom code.. The entire system was powered with a 5V 600mA Power Supply  
439 Unit (Elegoo Power MB V2, Elegoo Inc, Shenzhen, China).

440 High-speed video footage of the artificial labial mask was captured at 1000fps at a resolution of  
441 1280x1024p using an Olympus i-Speed 3 high-speed camera (iX Cameras, Rochford, Essex, UK)  
442 equipped with a Sigma Compact Hyperzoom 28-200mm/1:3.5-5.6 macro lens (Sigma, Tokyo, Japan).  
443 Data was saved in the AVI Codec and edited using Adobe Premiere CS6 (Adobe Systems Software,  
444 San José, CA, USA).

445

446 **Acknowledgments:** We are grateful to S. Bodenstein and K. Lehmann for help with the collection of  
447 the larvae and to H.-L. Tröger and M. Garitz for undergraduate research assistance. We are especially  
448 thankful for the help of L. Heepe for proofreading and many elucidating discussions. **Funding:** This  
449 project and the work of S.B. were financed by the DFG grant BU3169/1–1. **Author contributions:**  
450 S.B. and S.N.G. designed the project and developed the concept of the study. A.K. and S.B. did the  
451  $\mu$ CT analysis and post-processing. S.B. and A.K. did the HS-Video recordings. S.B. carried out the  
452 CLSM analysis and conducted the manipulation experiments. A.K. did the motion tracking and  
453 developed the robotic model. H.R. calculated the power output of the system. All authors wrote the  
454 manuscript as well as read and approved the final version. **Competing interests:** We declare, we  
455 have no competing interests. **Data and materials availability:** Supplemental data on reasonable  
456 request.

457

458 **References & Notes**

- 459 1. R. Dawkins, J.R. Krebs, Arms races between and within species. *Proc. R. Soc. Lond. B.* **205**, 489-  
460 511 (1979).
- 461 2. H. C. Bennet-Clark, The energetics of the jump of the locust *Schistocerca gregaria*. *J. Exp. Biol.*  
462 **63**, 53–83 (1975).

- 463 3. M. Burrows, Biomechanics: frog hopper insects leap to new heights. *Nature* **424**, 509 (2003).
- 464 4. S. N. Gorb, The jumping mechanism of cicada *Cercopis vulnerata* (Auchenorrhyncha, Cercopidae):  
465 skeleton–muscle organisation, frictional surfaces, and inverse-kinematic model of leg movements.  
466 *Arthropod Struc. Dev.* **33**, 201-220 (2004).
- 467 5. S. N. Patek, W. L. Korff, R. L. Caldwell, Biomechanics: deadly strike mechanism of a mantis  
468 shrimp. *Nature* **428**, 819–820 (2004).
- 469 6. M. Burrows, S. R. Shaw, G. P. Sutton, Resilin and chitinous cuticle form a composite structure for  
470 energy storage in jumping by frog hopper insects. *BMC Biol.* **6**, 41 (2008).
- 471 7. M. Ilton, M. S. Bhamla, X. Ma, S. M. Cox, L. L. Fitchett, Y. Kim, J.-S. Koh, D. Krishnamurthy, C.-  
472 Y. Kuo, F. Z. Temel, A. J. Crosby, M. Prakash, G. P. Sutton, R. J. Wood, E. Azizi, S. Bergbreiter, S. N.  
473 Patek, The principles of cascading power limits in small, fast biological and engineered systems.  
474 *Science* **360**, 397 (2018).
- 475 8. R. K. Josephson, Contraction dynamics and power output of skeletal muscle. *Annu. Rev. Physiol.*  
476 **55**, 527–546 (1993).
- 477 9. R.M. Alexander, H.C. Bennet-Clark, Storage of elastic strain energy in muscle and other tissues.  
478 *Nature* **265**, 114-117 (1977).
- 479 10. R.M. Alexander, Tendon elasticity and muscle function. *Comp. Biochem. Phys. A.* **133**, 1001-  
480 1011 (2002)
- 481 11. W. Gronenberg, Fast actions in small animals: springs and click mechanisms. *J. Comp. Physiol. A.*  
482 **178**, 727-734 (1996).
- 483 12. J. Michels, E. Appel, S. N. Gorb, Functional diversity of resilin in Arthropods. *Beilstein J.*  
484 *Nanotechnol.* **7**, 1241-1259 (2016).
- 485 13. T. Weis-Fogh, A rubber-like protein in insect cuticle. *J. Exp. Biol.* **37**, 889–907 (1960).
- 486 14. R. E. Lyons, D. C.C. Wong, M. Kim, N. Lekieffre, M. G. Huson, T. Vuocolo, D. J. Merritt, K. M.  
487 Nairn, D. M. Dudek, M. L. Colgrave, Christopher M. Elvin, Molecular and functional characterisation  
488 of resilin across three insect orders. *Insect Biochem. Mol. Biol.* **41**, 881–890 (2011).
- 489 15. T. Weis-Fogh, Molecular interpretation of the elasticity of resilin, a rubber-like protein. *J. Mol.*  
490 *Biol.* **3**, 648–667 (1961).
- 491 16. C. M. Elvin, A. G. Carr, M. G. Huson, J. M. Maxwell, R. D. Pearson, T. Vuocolo, N. E. Liyou, D.  
492 C. C. Wong, D. J. Merritt, N. E. Dixon, Synthesis and properties of crosslinked recombinant pro-  
493 resilin. *Nature* **437**, 999–1002 (2005).
- 494 18. S. Büsse, T. Hörnschemeyer, S. N. Gorb, The head morphology of *Pyrrhosoma nymphula* larvae  
495 (Odonata: Zygoptera) focusing on functional aspects of the mouthparts. *Front. Zool.* **14**, 25 (2017).
- 496 19. P. S. Corbet, *Dragonflies: behavior and ecology of Odonata* (Cornell University Press, New  
497 York, 1999).
- 498 20. G. Pritchard, Prey capture by dragonfly larvae (Odonata: Anisoptera). *Canad. J. Zool.* **43**, 271–289  
499 (1965).



- 500 21. J. Olesen, The hydraulic mechanism of labial extension and jet propulsion in dragonfly nymphs. *J.*  
501 *Comp. Physiol.* **81**, 53–55 (1972).
- 502 22. J. Olesen, Prey-capture in dragonfly nymphs (Odonata; Insecta): labial protraction by means of a  
503 multipurpose abdominal pump. *Vid. Medd. Dan. Naturalist. Foren.* **141**, 81–96 (1979).
- 504 23. Y. Tanaka, M. Hisada, The hydraulic mechanism of the predatory strike in dragonfly larvae. *J. Exp.*  
505 *Biol.* **88**, 1–19 (1980).
- 506 24. D. A. Parry, Labial extension in the dragonfly larva *Anax imperator*. *J. Exp. Biol.* **107**, 495–499  
507 (1983).
- 508 25. P. J. Mill, R. S. Pickard, R.S. Anal valve movement and normal ventilation in *Aeshnid* dragonfly  
509 larvae. *J. Exp. Biol.* **56**, 537–543 (1972).
- 510 26. P. J. Mill, R. S. Pickard, Jet-propulsion in anisopteran dragonfly larvae. *J. Comp. Physiol.* **97**, 320–  
511 338 (1975).
- 512 27. K. S. Cole, D. L. Gilbert, Jet propulsion of squid. *Biol. Bull.* **138**, 245-246 (1970).
- 513 28. S. Büsse, S. N. Gorb, Material composition of the mouthpart cuticle in a damselfly larva (Insecta:  
514 Odonata) and its biomechanical significance. *Royal Soc. Open Sci.* **5**, 172117 (2018).
- 515 17. R. E. Snodgrass, The dragonfly larva. *Smith. Misc. Coll.* **12**, 38 (1954).
- 516 29. A. Blanke, S. Büsse, R. Machida, Coding characters from different life stages for phylogenetic  
517 reconstruction: a case study on dragonfly adults and larvae, including a description of the larval head  
518 anatomy of *Epiophlebia superstes* (Odonata: Epiophlebiidae). *Zool. J. Linnean Soc.* **174**, 718–732  
519 (2015).
- 520 30. M. Burrows, G.P. Sutton, Locusts use a composite of resilin and hard cuticle as an energy store for  
521 jumping and kicking. *J. Exp. Biol.* **215**, 3501-3512 (2012).
- 522 31. F.J. Larabee, W. Gronenberg, A.V. Suarez, Performance, morphology and control of power-  
523 amplified mandibles in the trap-jaw ant *Myrmoteras* (Hymenoptera: Formicidae). *J. Exp. Biol.* **220**,  
524 3062-3071 (2017).
- 525 32. G.N. Askew, R.L. Marsh, Muscle designed for maximum short-term power output: quail flight  
526 muscle. *J. Exp. Biol.* **205**, 2153-2160 (2002).
- 527 33. M. Burrows, Jumping mechanisms and performance of snow fleas (Mecoptera, Boreidae). *J.*  
528 *Exp. Biol.* **214**, 2362-2374 (2011).
- 529 34. K. Nadein, O. Betz, Jumping mechanisms and performance in beetles. I. Flea beetles (Coleoptera:  
530 Chrysomelidae: Alticini). *J. Exp. Biol.* **219**, 2015-2027 (2016).
- 531 35. S. Vogel, *Life in moving fluids*. (Princeton University Press, Princeton, 1994).
- 532 36. R. J. Rowe, Predatory versatility in a larval dragonfly, *Hemianax papuensis* (Odonata: Aeshnidae).  
533 *J. Zool. Lond.* **221**, 193-207 (1987).
- 534 37. S. Ebaschi, Calcium binding activity of vesicular relaxing factor. *J. Biochem.* **50**, 236-244 (1961).

- 535 38. J. Michels, S. N. Gorb, Detailed three-dimensional visualization of resilin in the exoskeleton of  
536 arthropods using confocal laser scanning microscopy. *J. Microsc.* **245**, 1–16 (2012).
- 537 39. D. Young, H. Bennet-Clark, The role of the tymbal in Cicada sound production. *J. Exp.Biol.* **198**,  
538 1001–1019 (1995)
- 539 40. E. Appel, L. Heepe, C.-P. Lin, S.N. Gorb, Ultrastructure of dragonfly wing veins: composite  
540 structure of fibrous material supplemented by resilin. *J. Anat.* **227**, 561-582 (2015).
- 541 41. I. Siwanowicz, M. Burrows, Three dimensional reconstruction of energy stores for jumping in  
542 planthoppers and froghoppers from confocal laser scanning microscopy. *eLife*, **6**, e23824 (2017).
- 543 42. A. Koehnsen, J. Kambach, S. Büsse, Step by step and frame by frame - workflow for efficient  
544 motion tracking of high-speed movements in animals. *Zoology* (2020).  
545 <https://doi.org/10.1016/j.zool.2020.125800>
- 546 43. D.W. Haldane, M.M. Plecnik, J.K. Yimand, R. S. Fearing, Robotic vertical jumping agility via  
547 series-elastic power modulation. *Science Robotics*, **1**, eaag2048 (2016).
- 548
- 549

550 **Table**

|                                | Segment 1 (prementum) |         | Segment 2 (postmentum) |         | N |
|--------------------------------|-----------------------|---------|------------------------|---------|---|
|                                | Mean                  | SD      | Mean                   | SD      |   |
| Angle [°]                      | 79                    | 11      | 126                    | 5       | 3 |
| $\omega$ [rad/s]               | 72,54                 | 33,32   | 71,42                  | 26,89   | 5 |
| $v$ [m/s]                      | 0,73                  | 0,33    | 0,49                   | 0,18    | 5 |
| $\alpha$ [rad/s <sup>2</sup> ] | 6673,50               | 3697,30 | 5917,69                | 3046,10 | 5 |
| $a_T$ [m/s <sup>2</sup> ]      | 66,74                 | 36,97   | 40,24                  | 20,71   | 5 |
| $a_T$ [g]                      | 6,80                  | 3,77    | 4,10                   | 2,11    | 5 |
| P[W/kg]                        | 2113,53               | 2535,46 | 2232,81                | 2560,41 | 5 |

551  
 552 Table 1: Key characteristics of the performance of the predatory strike.  
 553 Angle: maximum opening angle from resting position for both prementum and postmentum in  
 554 [°].  $\omega$ : maximum angular velocity of both the pre and postmentum during protraction in  
 555 radians per second.  $v$ : maximum tangential velocity at the distal tip of the  
 556 prementum/postmentum, calculated from angular velocity.  $\alpha$ : maximum angular acceleration  
 557 calculated as first derivative from angular velocity in [rad/s<sup>2</sup>].  $a_T$ : tangential acceleration at the  
 558 distal tip of prementum/postmentum, calculated from angular acceleration in [m/s<sup>2</sup>] and [g].  
 559 N = number of biological replicates.  
 560

561 **Figures**

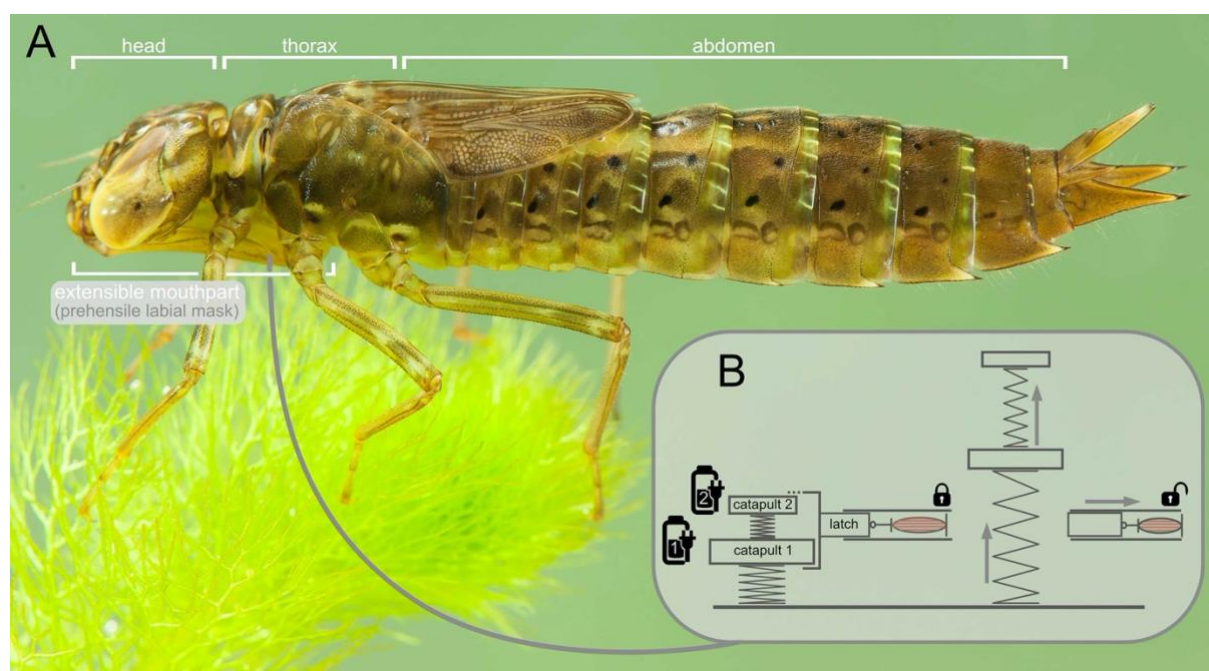

562  
563 **Figure 1:** Dragonfly: *Anax imperator* (Odonata: Anisoptera) **A.** Photography, lateral view, ©  
564 Christophe Brochard – Brochard Photography. **B.** Abstract principle of the concept of a dual-catapult  
565 system.  
566

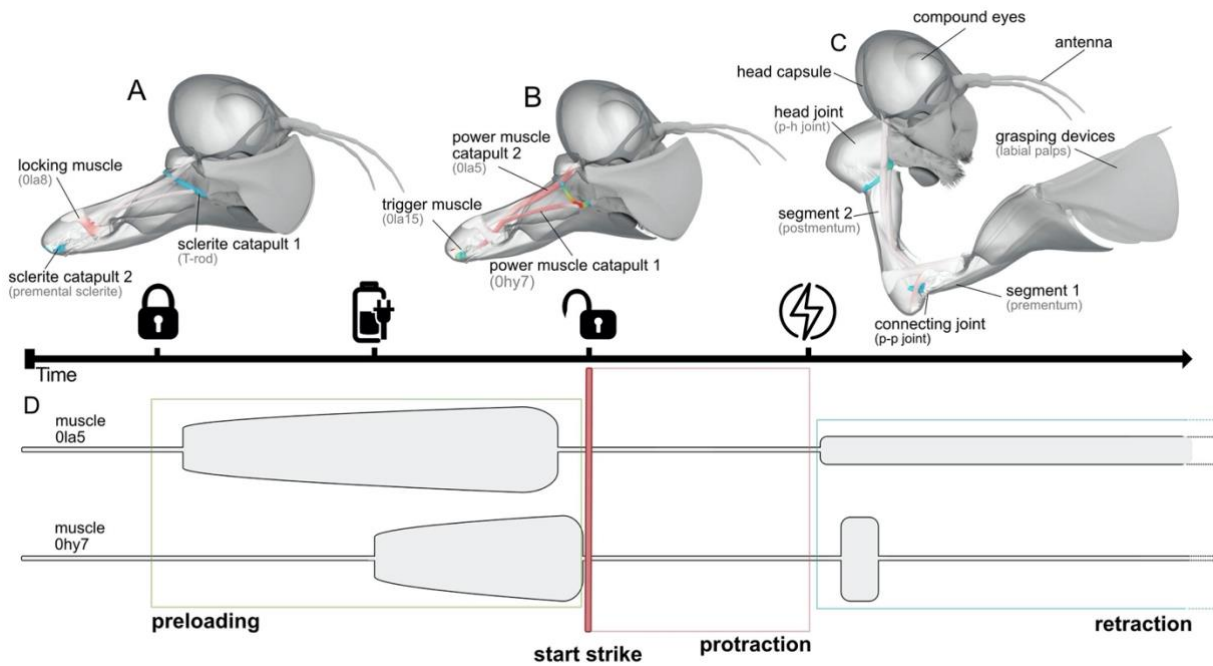

567

568 **Figure 2:** Morphology of the extensible mouthpart (prehensile labial mask) and a simplified sequence

569 of the predatory strike; three-dimensional visualisation derived from  $\mu$ CT data of *Sympetrum* sp.

570 (Odonata: Anisoptera). Colour-code: grey muscles = relaxed, red muscles = contracted; blue sclerites

571 = undeformed, red sclerites = deformed. **A.** preparation for predatory strike, locking **B.** Preloading and

572 triggering of the protraction **C.** Unlocking and protraction of the extensible mouthpart (prehensile

573 labial mask). **D.** Electrophysiology of the predatory strike, showing muscle activity of the power

574 muscles (0la5 and 0hy7) during preloading, protraction and retraction (modified after 23).

575

576

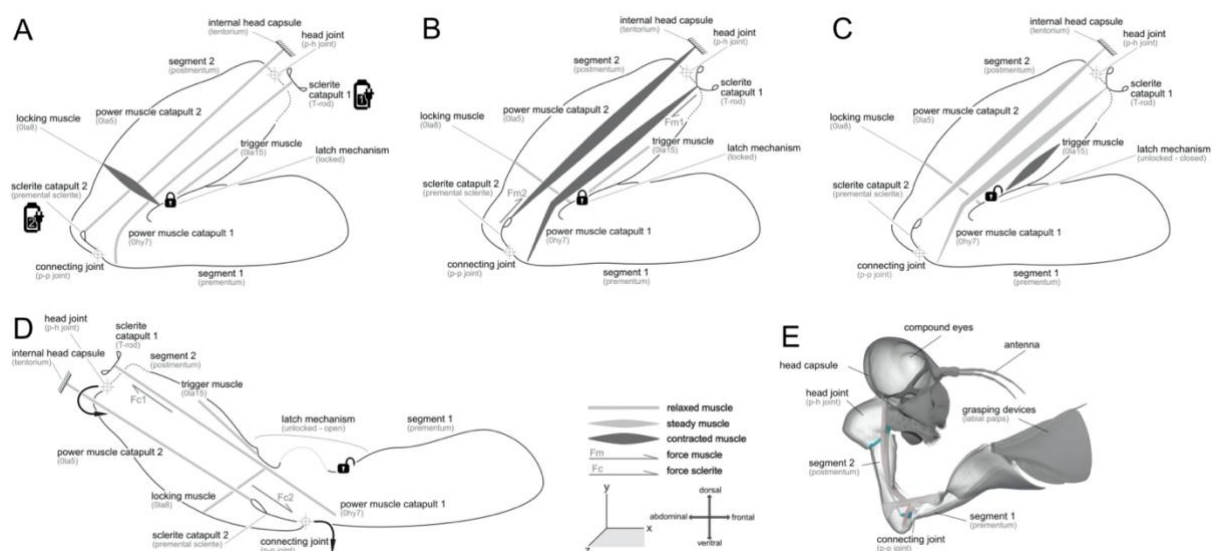

577  
 578 **Figure 3:** Detailed principle of movement of the extensible mouthpart (prehensile labial mask) and  
 579 functioning of the synchronised dual catapult system. **A.** Locking: contraction of the locking muscle  
 580 (Ola8) and closing the knob, groove and wedge system (see fig. 4D). **B.** Preloading: contraction of  
 581 power muscle catapult 1 (Ohy7) and deflection (fm1) of sclerite catapult 1 (T-rod) as well as  
 582 contraction of power muscle catapult 2 (Ola5) and deflection (fm2) of sclerite catapult 2 (premental  
 583 sclerite). **C.** Triggering: contraction of the trigger muscle (Ola15) and opening the knob, groove and  
 584 wedge system (see fig. 4J). **D.** Protraction: releasing the stored energy (fc1 and fc2) of sclerite catapult  
 585 1 (T-rod) and sclerite catapult 2 (premental sclerite) to protect the extensible mouthpart (prehensile  
 586 labial mask). **E.** Morphology of the extensible mouthpart (prehensile labial mask), three-dimensional  
 587 visualisation derived from  $\mu$ CT data of *Sympetrum* sp. (Odonata: Anisoptera).  
 588



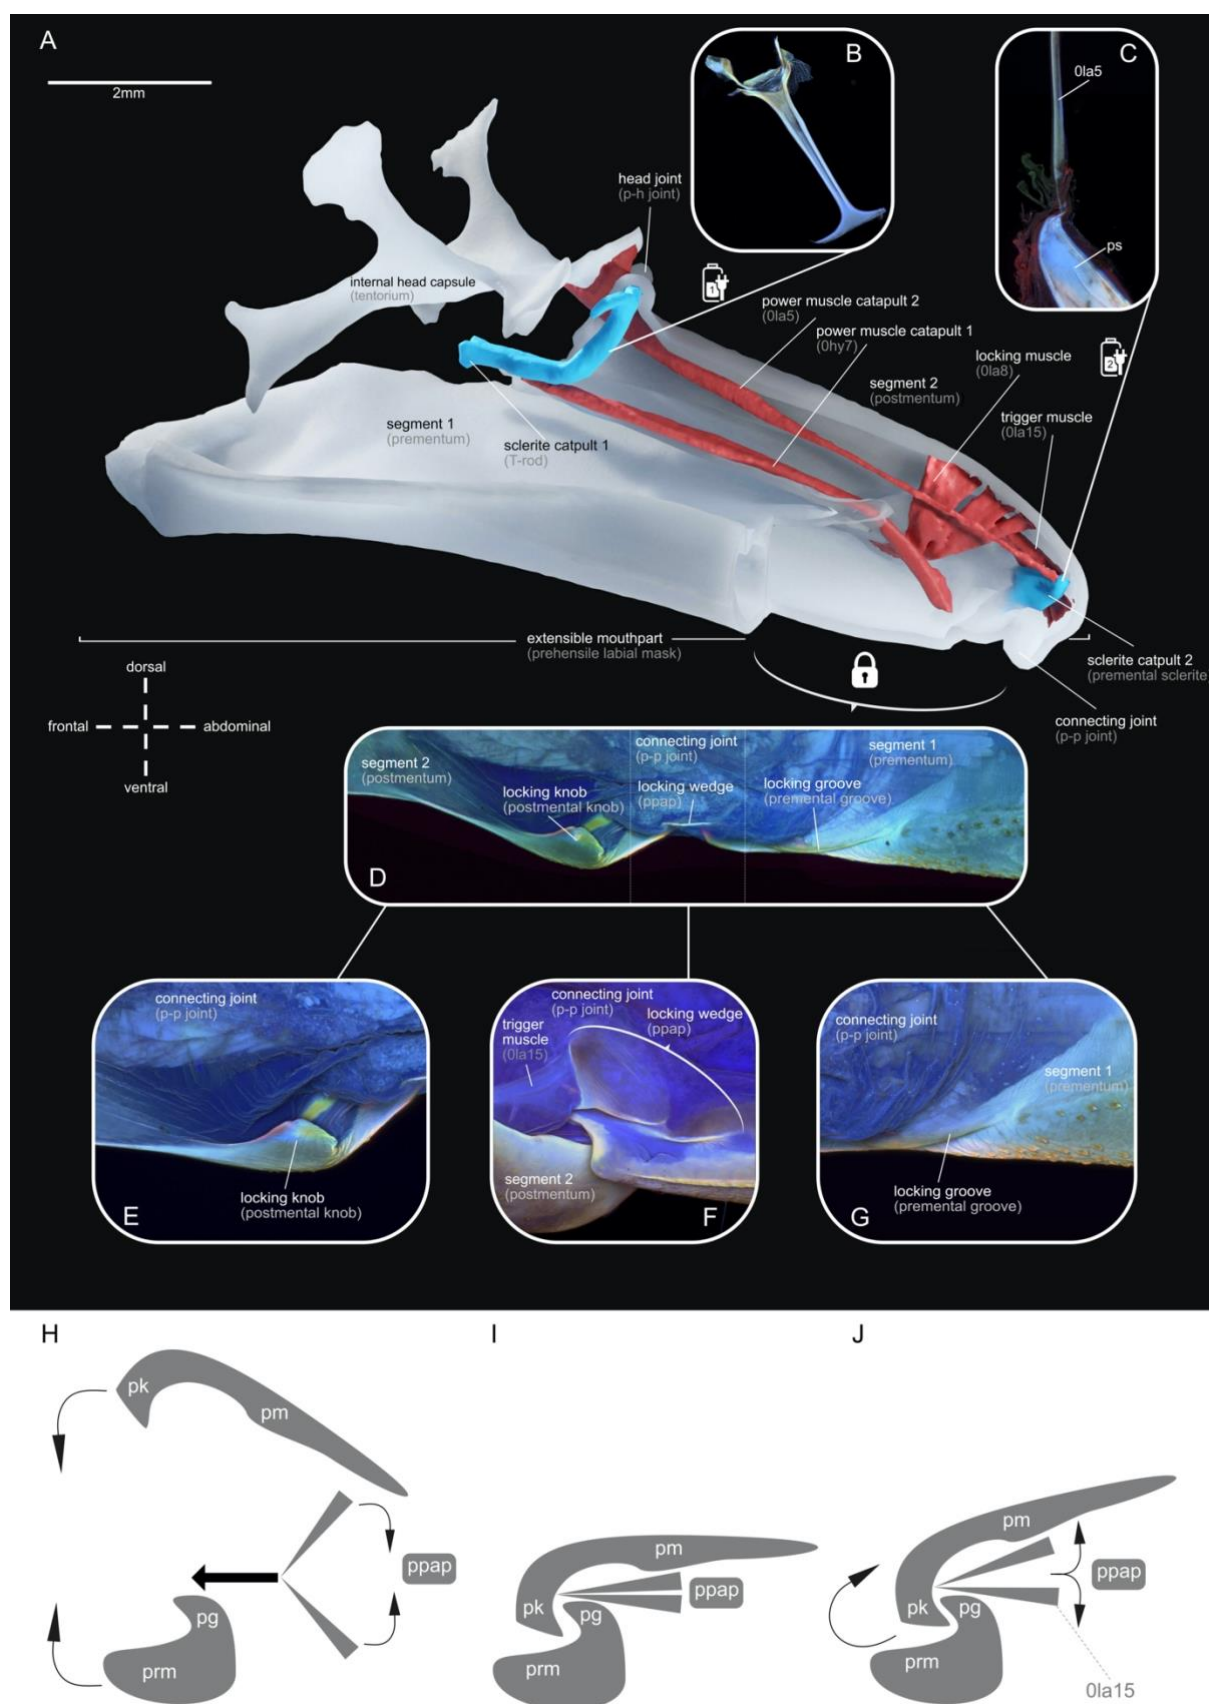

589

590 **Figure 4:** Morphology and material composition of the power unit and locking mechanism of the  
 591 dual-catapult system in *Anax* sp. (Odonata: Anisoptera). **A.** Extensible mouthpart (prehensile labial  
 592 mask), three-dimensional visualisation derived from  $\mu$ CT data. **B-G.** CLSM maximum intensity

593 projection, autofluorescences indicates material composition of the cuticle: red – sclerotised, green –  
594 chitinous, and blue – resilin-dominated (28). **B.** Sclerite catapult 1 (T-rod). **C.** Sclerite catapult 2  
595 (premental sclerite) and power muscle catapult 2 (0la5). **D.** Locking mechanism of the labial mask,  
596 dorsal view. **E.** Locking groove (premental groove), detail, dorsal view. **F.** Locking wedge  
597 (prementum-postmentum articular plate), detail, lateral view. **G.** Locking knob (postmental knob),  
598 detail, median view. **H-J.** Principle of the locking/unlocking process. **H.** locking. **I.** locked **J.**  
599 unlocking.

600

601 **Abbreviations:** pg – premental groove (locking groove); pk – postmental knob (locking knob); pm –  
602 postmentum (segment 2); ppap – prementum-postmentum articular plate (locking wedge); prm –  
603 prementum (segment 1).

604

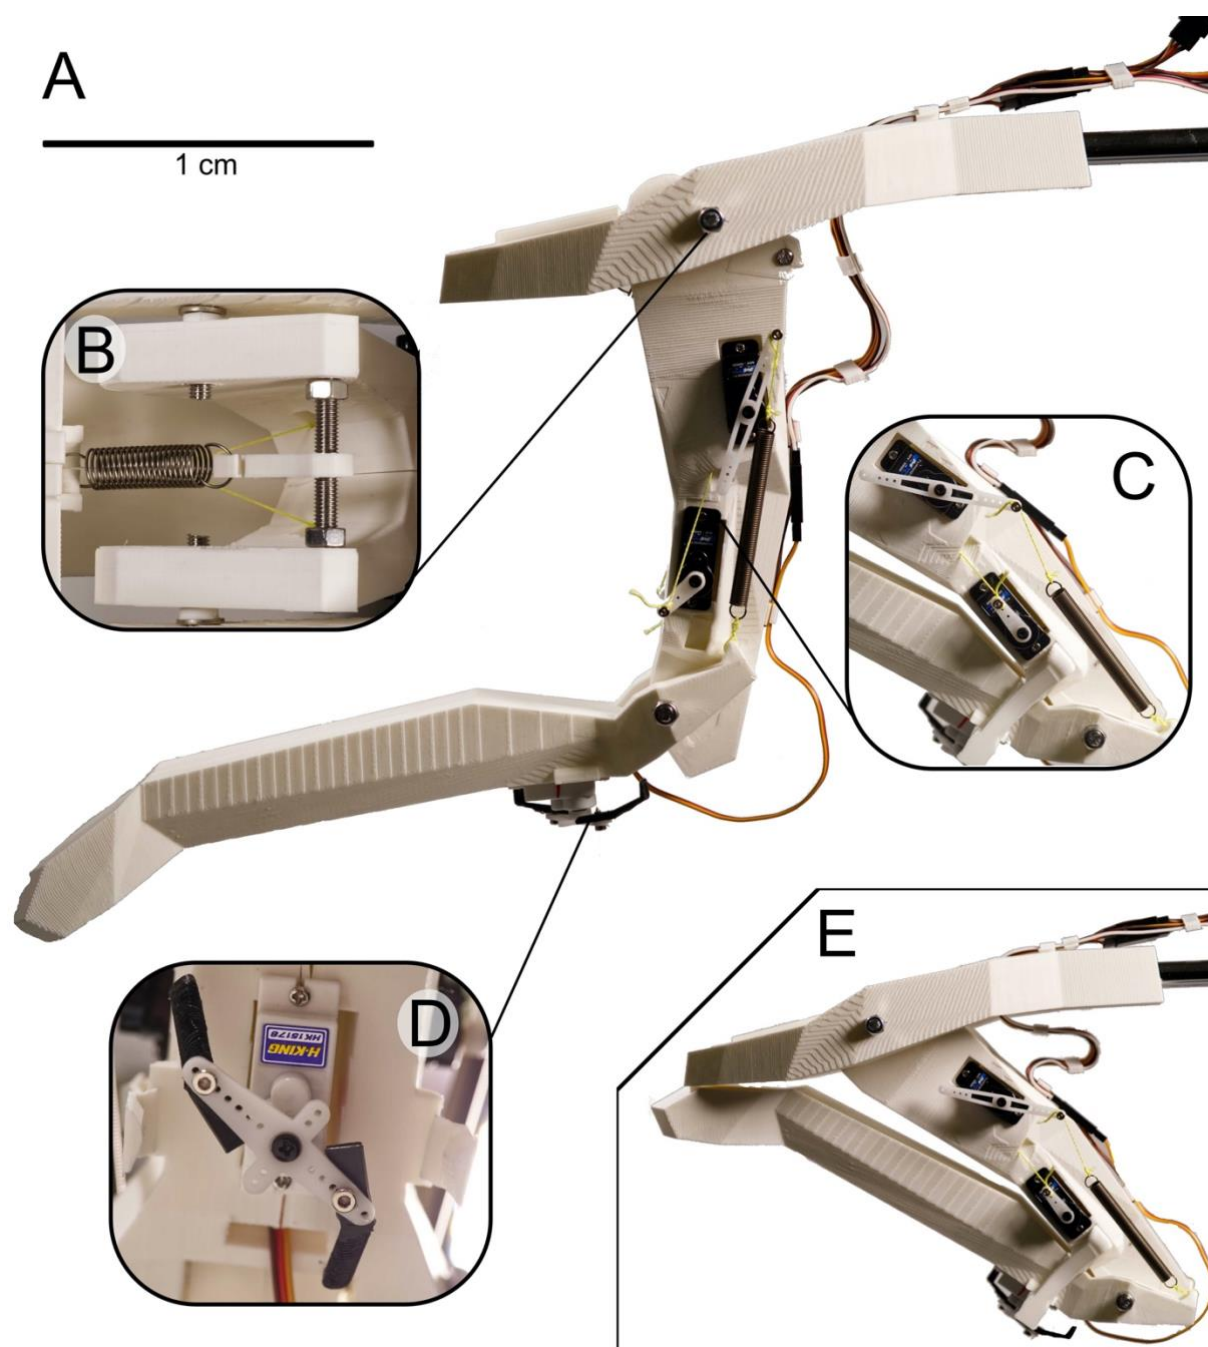

605  
606 **Figure 5:** Robotic extensible mouthpart (prehensile labial mask), 3D printed. **A.** open. **B.** artificial  
607 spring catapult 1. **C.** artificial spring catapult 2 and artificial muscles (servo motors). **D.** artificial lock  
608 (servo motor). **E.** closed.  
609

#### 610 **Supplementary Materials**

611 Fig. S1 to S5 (one .pdf file)

612 Movies S1 to S5 (on reasonable request [sbuesse@zoologie.uni-kiel.de](mailto:sbuesse@zoologie.uni-kiel.de)).

613

614
